# Supplementary material for: Utilization of catecholic functionality in natural safrole and eugenol to synthesize mussel-inspired polymers
Source: Royal Society of Chemistry journal article supplement (doi:10.1039/c9ra04719k), 2019-01-01
Supplement: c9ra04719k1.pdf [file c9ra04719k1.pdf]

## **Base catalyzed polymerization of safrole oxide (2)**

### ***Polymerization using TBAF***

The conditions for polymerizations are described in Table S1. Safrole oxide **2** (178 mg, 1.00 mmol), Bu<sub>4</sub>NF (0.1 mol), added as Bu<sub>4</sub>NF.3H<sub>2</sub>O or as 1 M solution in THF, in toluene (2.0 mL) and the solvent along with moisture was evaporated using a gentle stream of N<sub>2</sub>. The mixture was then heated under N<sub>2</sub> at 70 °C for 24 h. Thereafter, 4:1 (v/v) methanol/water (10 mL) was added to quench the polymerization, and polymer **5** was extracted with ether. The ether layer was dried (Na<sub>2</sub>SO<sub>4</sub>) and concentrated to obtain the polymer.

### ***Polymerization using TBAH***

As described in Table S1, safrole oxide **2** (237 mg, 1.33 mmol), TBAH 40% in water (28 mg, 0.0432 mmol) and toluene (5.0 mL) were mixed and the solvent along with the moisture was evaporated using a gentle stream of N<sub>2</sub>. Heating at 70 °C for 15 h was followed by quenching with methanol/water and then polymer **5** was extracted with ether. The ether layer was dried (Na<sub>2</sub>SO<sub>4</sub>) and concentrated to obtain the polymer.

## **Attempted synthesis of diphenylsilyl protected 4-allylcatechol (11)<sup>1</sup>**

Tris(pentafluorophenyl)borane (5.6 mg, 0.01 mmol) was added under N<sub>2</sub> at 25 °C to a stirred solution of eugenol **10** (871 mg, 5.3 mmol) and diphenylsilane (1.11 g, 6.0 mmol, 1.1 equiv) in dichloromethane (5 mL) in a RB flask (50 mL) fitted with a condenser. The exothermic reaction was completed within minutes with the evolution of a gas. The reaction mixture upon silica gel chromatography using hexane/ether as eluant gave 4-allylcatechol **12** (77%):  $\delta_{\text{H}}$

(CDCl<sub>3</sub>): 3.27 (2H, d, *J* 6.7 Hz), 5.03 - 5.07 (2H, m), 5.88 – 5.96 (1H, m), 6.62 (1H, dd, *J* 2.2 Hz, *J* 7.9 Hz), 6.71 (1H, d, *J* 2.2 Hz), 6.79 (1H, d, *J* 7.9 Hz);  $\delta_C$  (CDCl<sub>3</sub>): 39.51, 115.37, 115.59, 115.72, 121.02, 133.25, 137.64, 141.70, 143.48 (CDCl<sub>3</sub> middle carbon: 77.04),  $\nu_{\max}$ . (KBr): 3422, 3078, 3005, 2978, 2904, 1697, 1639, 1605, 1520, 1444, 1413, 1356, 1281, 1192, 1147, 1112, 995, 964, 916, 814, and 789 cm<sup>-1</sup>.

### ***General Procedure for attempted block copolymerization***

Block copolymerization of **2** and **7** was unsuccessful. After completion of polymerization of monomer **2**, the second monomer **7** was added. However, the sequence led to the formation of two homopolymers.

When 1 M <sup>i</sup>Bu<sub>3</sub>Al solution in hexane was used for polymerization a two-phase system developed in which the homopolymer of **2** remained in the more viscous phase, while that of **7** remained in the less viscous layer. When <sup>i</sup>Bu<sub>3</sub>Al solution (25% in toluene) was used for polymerization, the system remained in one phase. But after work up, the material separated into two phases with the upper phase having the homopolymer of allyl glycidyl ether **7**, while the lower phase contained the homopolymer of saffrole oxide **2**.

### **Reference in Supporting Information.**

- 1 J. Heo, T. Kang, S. G. Jang, D. S. Hwang, J. M. Spruell, K. L. Killops, J. H. Waite and C. J. Hawker, *J. Am. Chem. Soc.*, 2012, **134** (49), 20139–20145.

**Table S1.** Polymerization of safrole oxide **2**<sup>a</sup>

| Entry | Solvent           | Catalyst (mmol)                  | Temp<br>( °C) | Time<br>(h) | Yield<br>(%) |
|-------|-------------------|----------------------------------|---------------|-------------|--------------|
| 1     | Neat <sup>b</sup> | TBAF.3H <sub>2</sub> O (0.06)    | 85            | 18          | Trace        |
| 2     | Neat <sup>b</sup> | TBAF.3H <sub>2</sub> O (0.06)    | 90            | 18          | Trace        |
| 3     | Neat <sup>b</sup> | TBAH 40% H <sub>2</sub> O (0.05) | 85            | 18          | ≈100         |
| 4     | Neat <sup>c</sup> | TBAH 40% H <sub>2</sub> O (0.03) | 50            | 24          | 45           |
| 5     | Neat <sup>c</sup> | TBAH 40% H <sub>2</sub> O (0.03) | 50            | 66          | 55           |
| 6     | THF <sup>d</sup>  | TBAH 40% H <sub>2</sub> O (0.03) | 50            | 24          | Trace        |
| 7     | THF <sup>d</sup>  | TBAH 40% H <sub>2</sub> O(0.03)  | 50            | 66          | Trace        |
| 8     | Neat <sup>b</sup> | TBAH 40% H <sub>2</sub> O (0.05) | 70            | 18          | 78           |
| 9     | Neat <sup>b</sup> | TBAH 40% H <sub>2</sub> O (0.02) | 90            | 2           | ≈100         |
| 10    | Neat <sup>b</sup> | TBAH 40% H <sub>2</sub> O(0.02)  | 100           | 18          | ≈100         |
| 11    | Neat <sup>b</sup> | TBAH 40% H <sub>2</sub> O (0.04) | 100           | 2           | 77           |
| 12    | Neat <sup>b</sup> | TBAH 40% H <sub>2</sub> O (0.04) | 100           | 4           | 86           |
| 13    | Neat <sup>b</sup> | TBAH 40% H <sub>2</sub> O (0.04) | 100           | 24          | 94           |
| 14    | Neat <sup>b</sup> | NaO <sup>t</sup> Bu (0.05)       | 100           | 18          | 0            |

<sup>a</sup>1.00 mmol; <sup>b</sup>Toluene was added and removed under N<sub>2</sub>; <sup>c</sup>Toluene was added and removed under N<sub>2</sub> then dried under vacuum; <sup>d</sup>THF was added and removed under N<sub>2</sub>. then dried under vacuum.

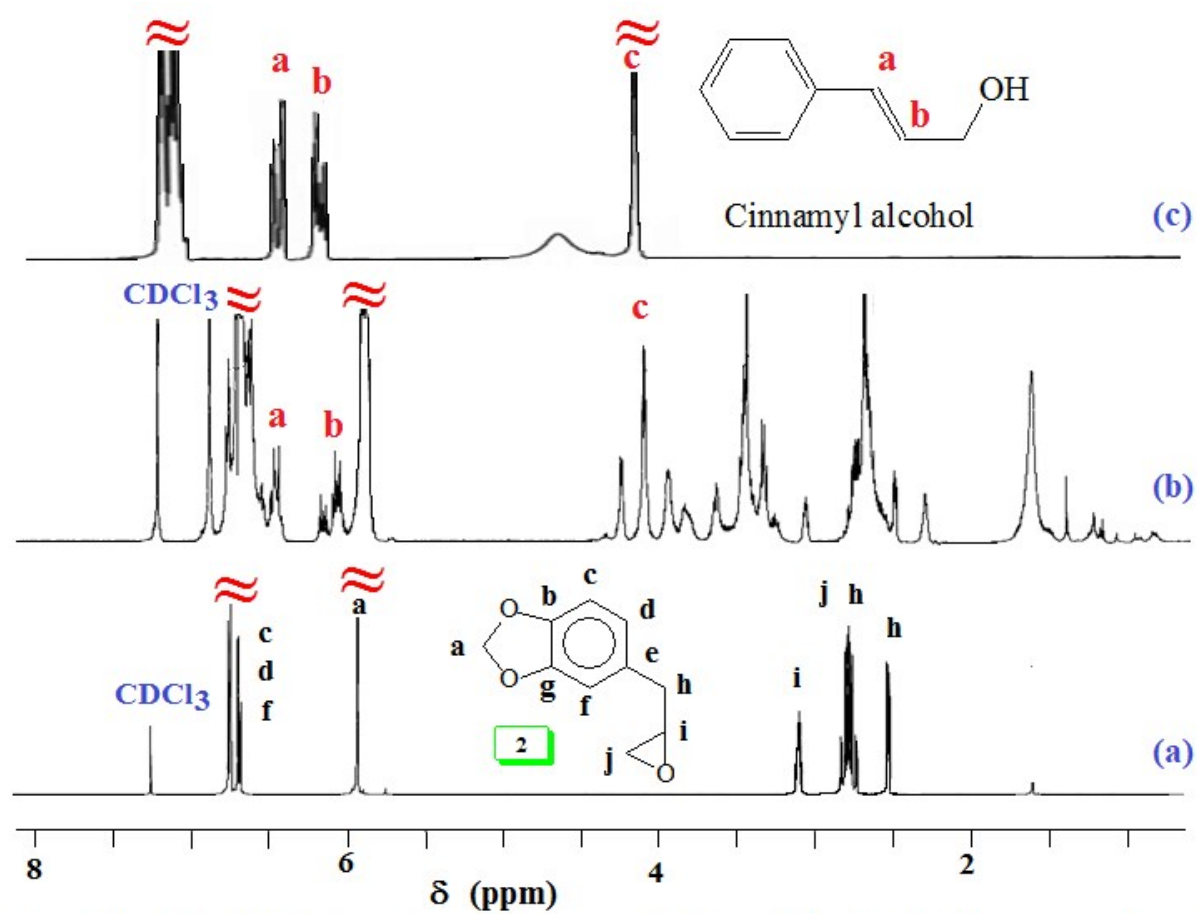

**Fig. S1.**  $^1\text{H}$  NMR spectra of (a) safrole oxide **2**, (b) base catalyzed polymerized product from **2**, (c) cinnamyl alcohol in  $\text{CDCl}_3$ .

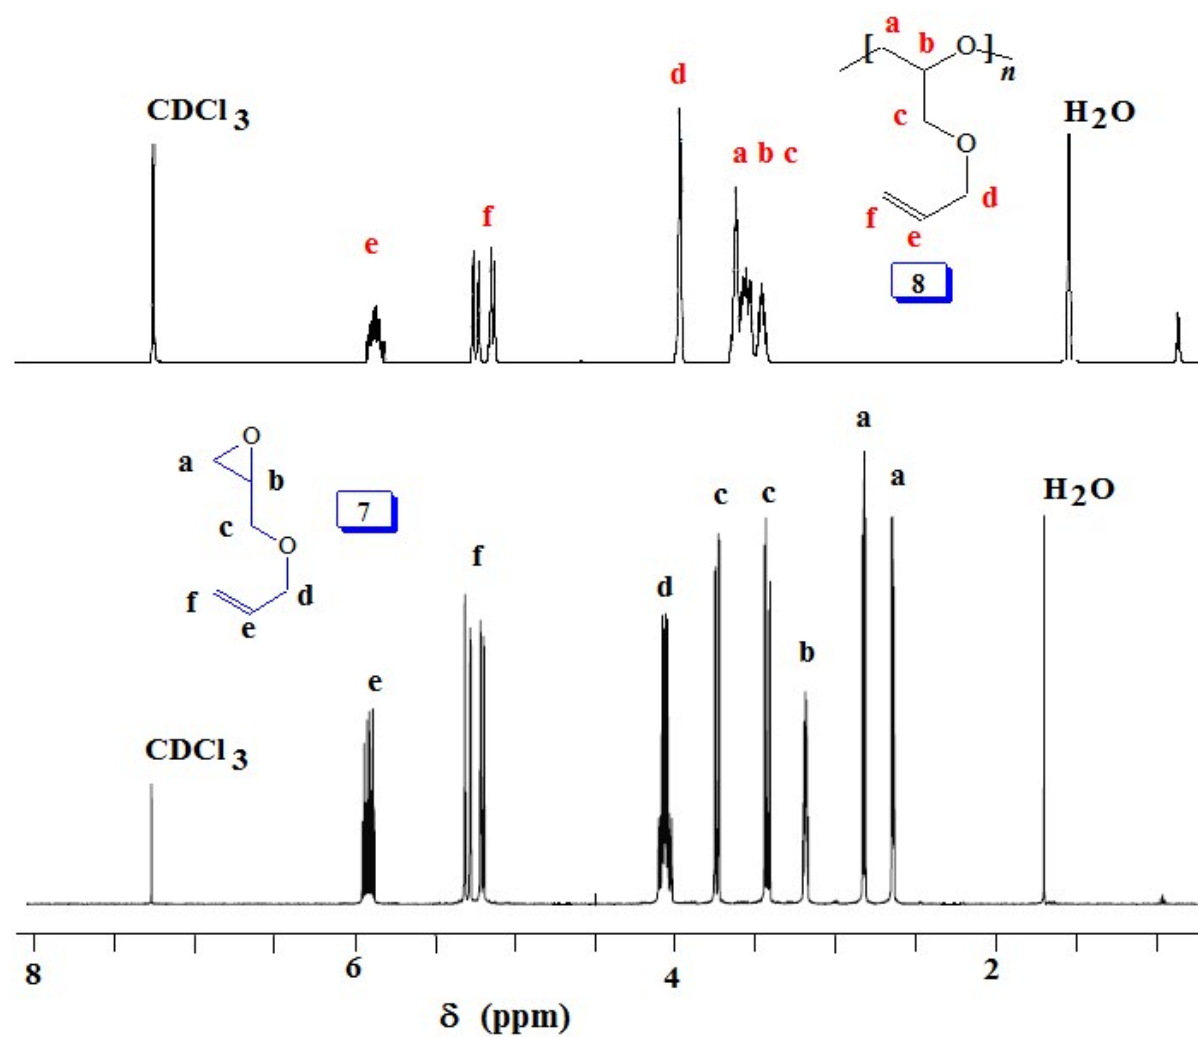

**Fig. S2.**  $^1\text{H}$  NMR spectra of (a) AGE 7 and (b) polymer 8 in  $\text{CDCl}_3$ .

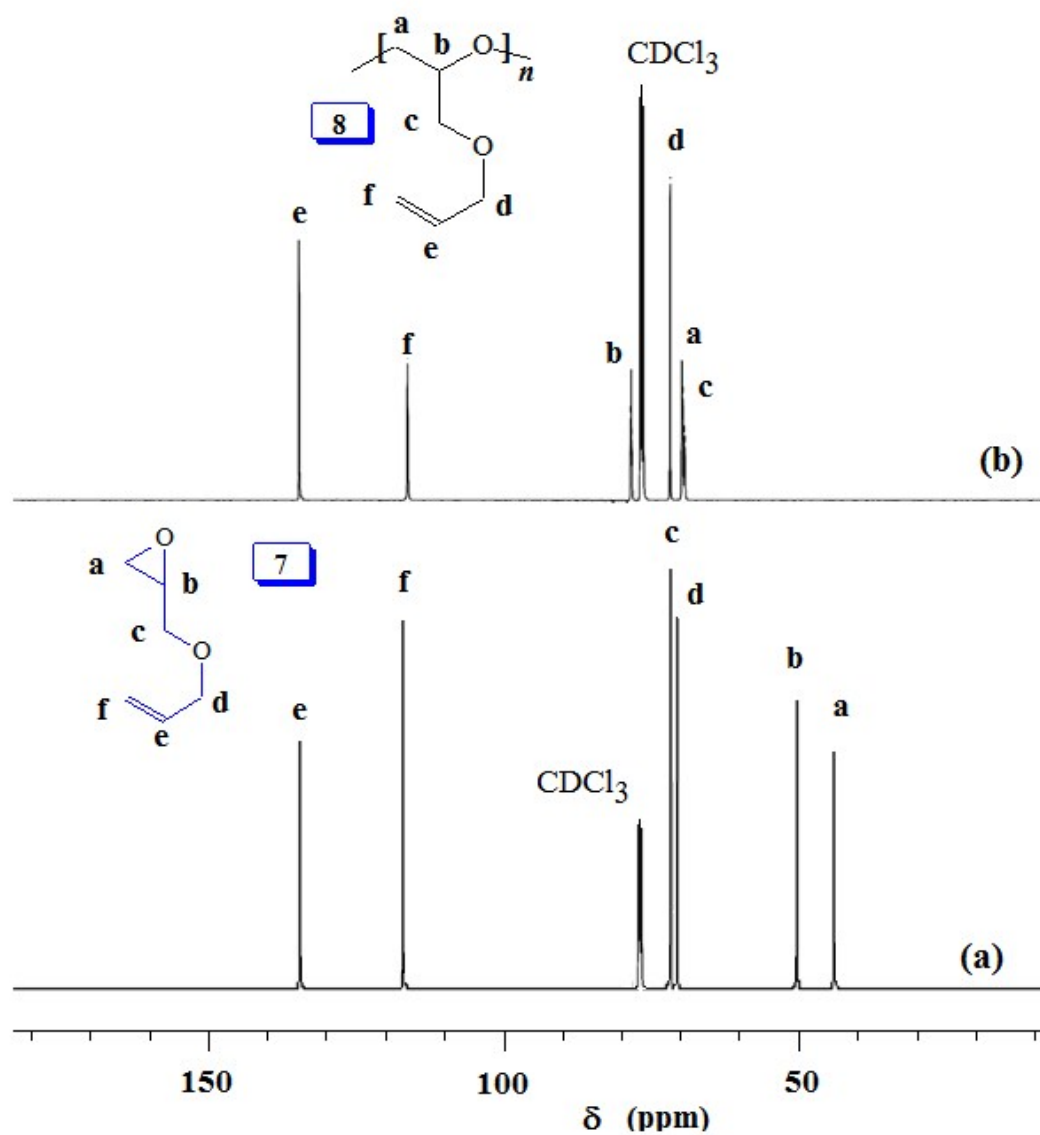

**Fig. S3.**  $^{13}\text{C}$  NMR spectra of (a) AGE 7 and (b) polymer 8 in  $\text{CDCl}_3$ .

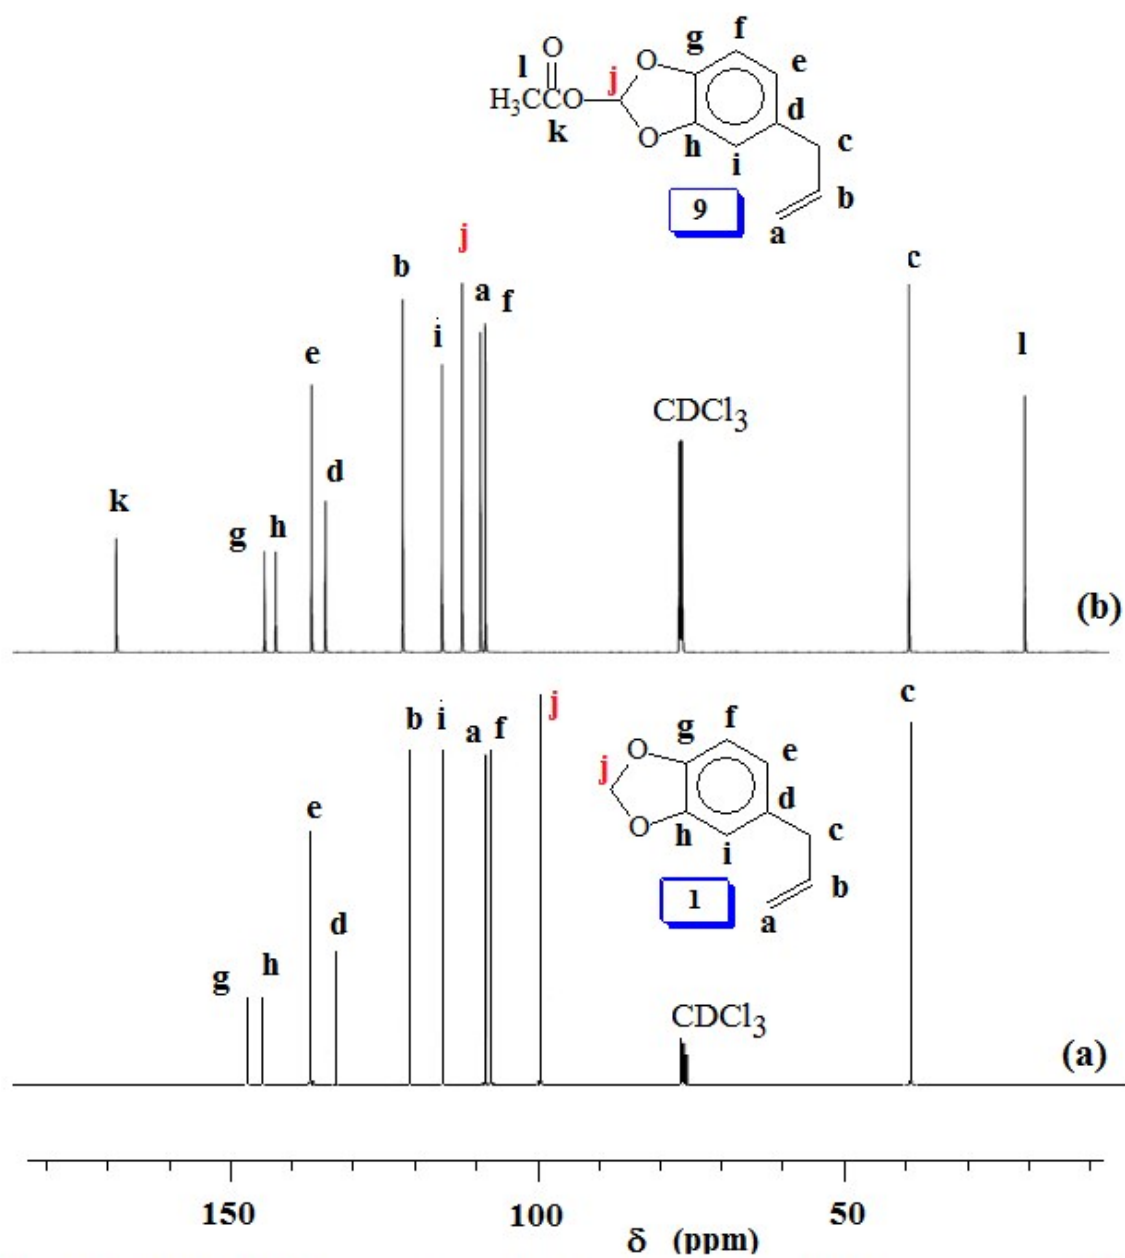

**Fig. S4.**  $^{13}\text{C}$  NMR spectra of (a) safrole **1** and (b) acetoxysafrole **9** in  $\text{CDCl}_3$ .

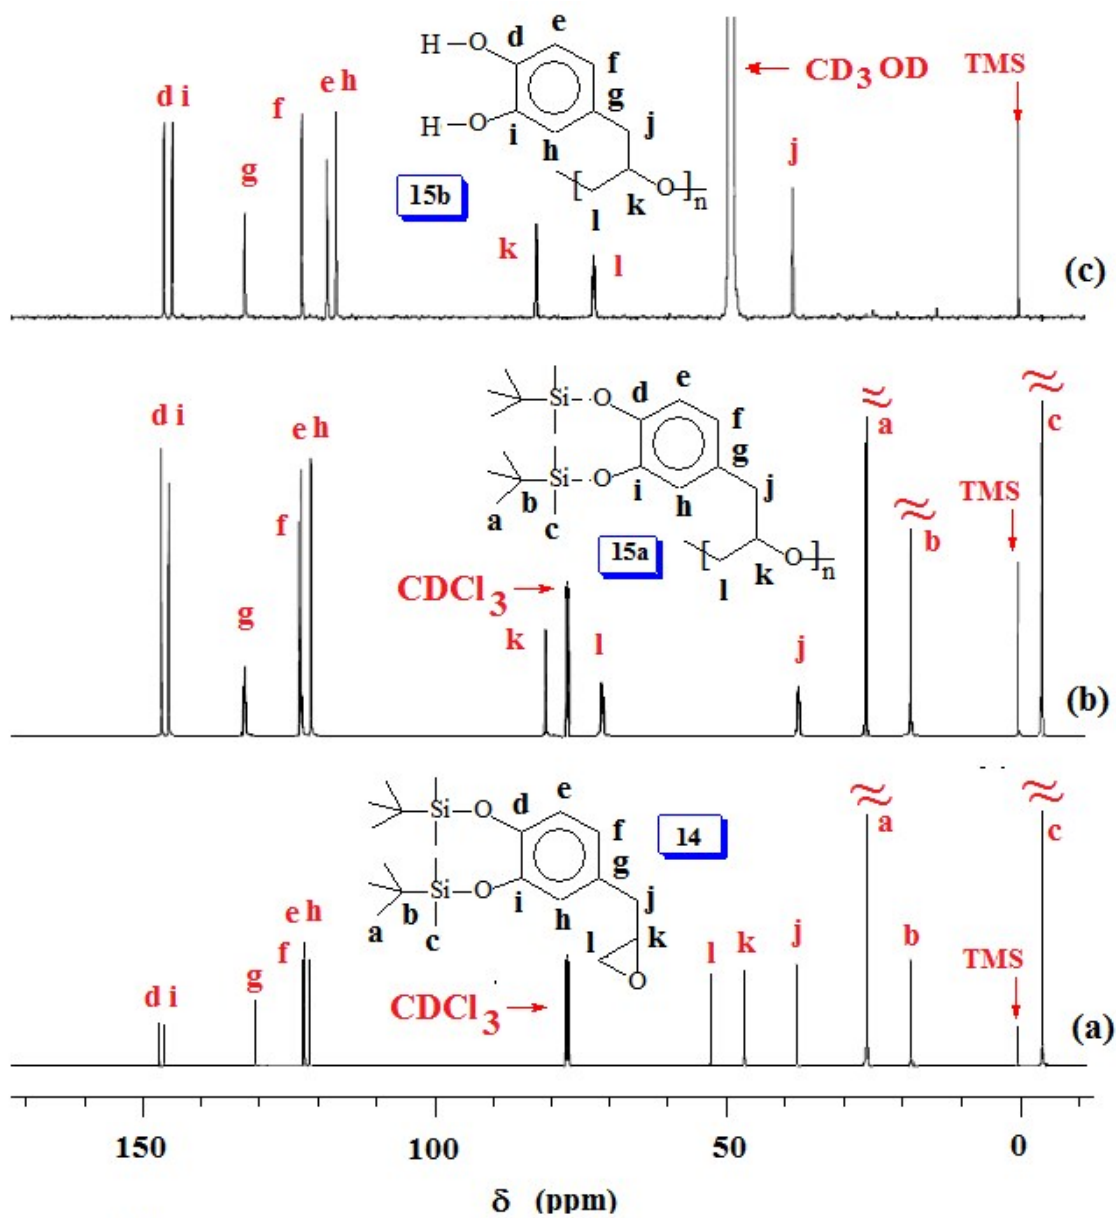

**Fig. S5.**  $^{13}\text{C}$  NMR spectra of (a) 14 and (b) 15a in  $\text{CDCl}_3$ ; and (c) 15b in  $\text{CD}_3\text{OD}$ .



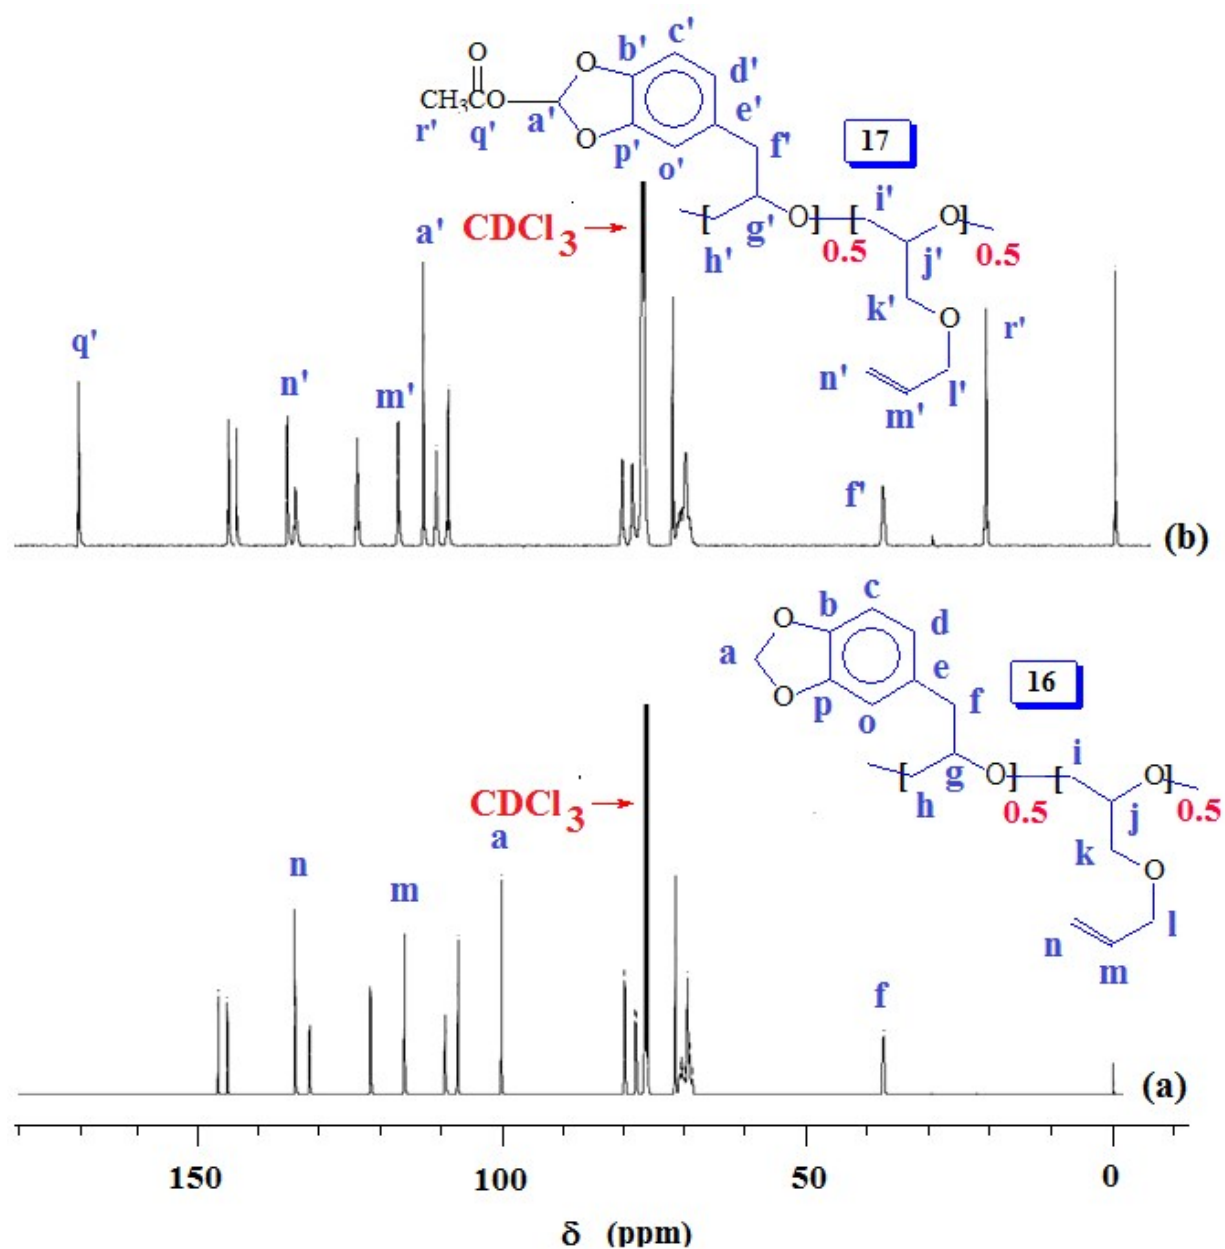

**Fig. S6.**  $^{13}\text{C}$  NMR spectra of (a) 1:1 random copolymer **16** and (b) 1:1 random copolymer **17** in  $\text{CDCl}_3$ .

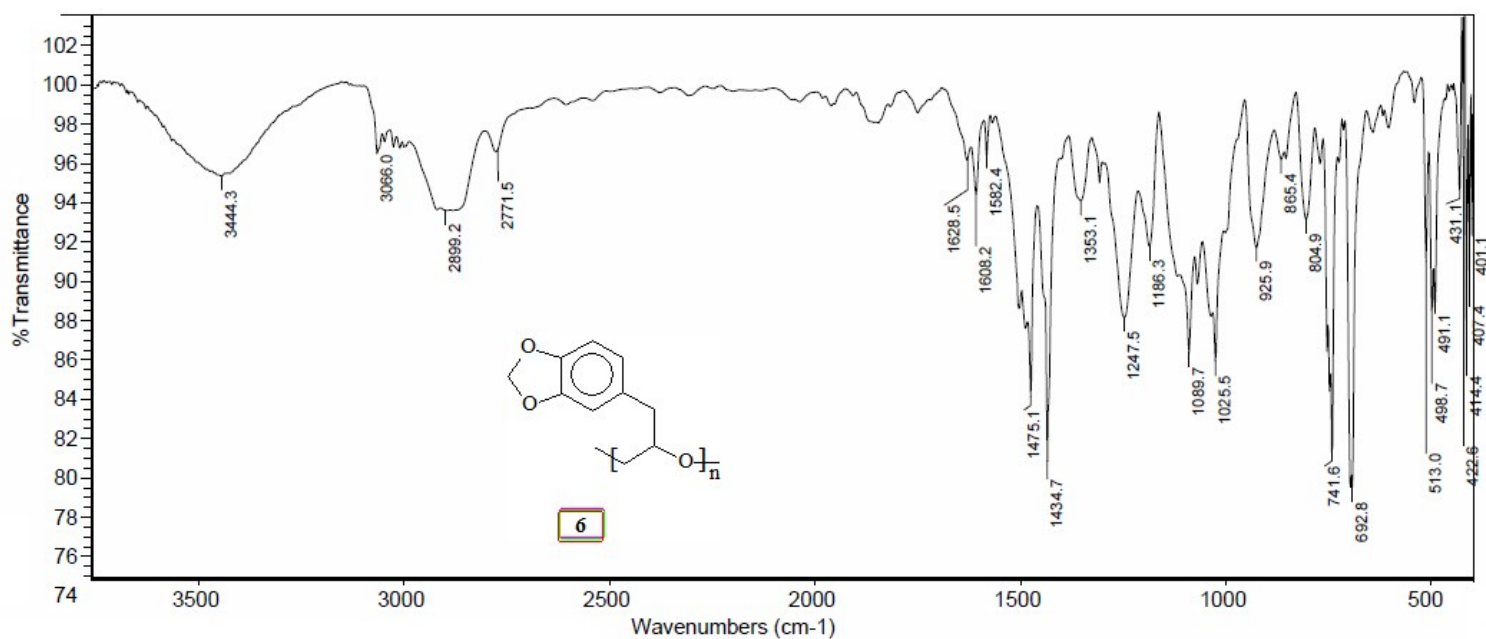

**Fig. S7.** IR spectrum of polymer 6.

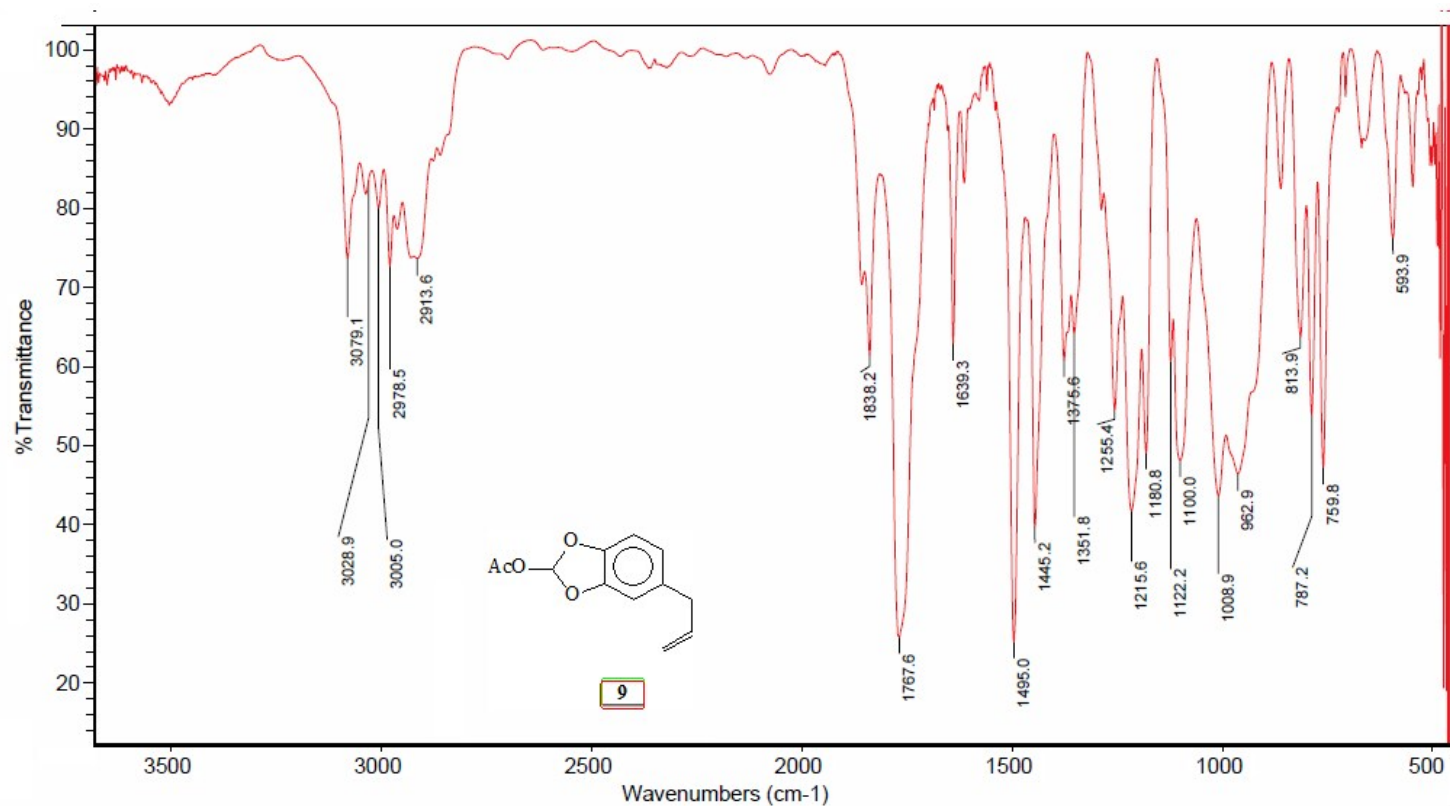

**Fig. S8.** IR spectrum of polymer 9.

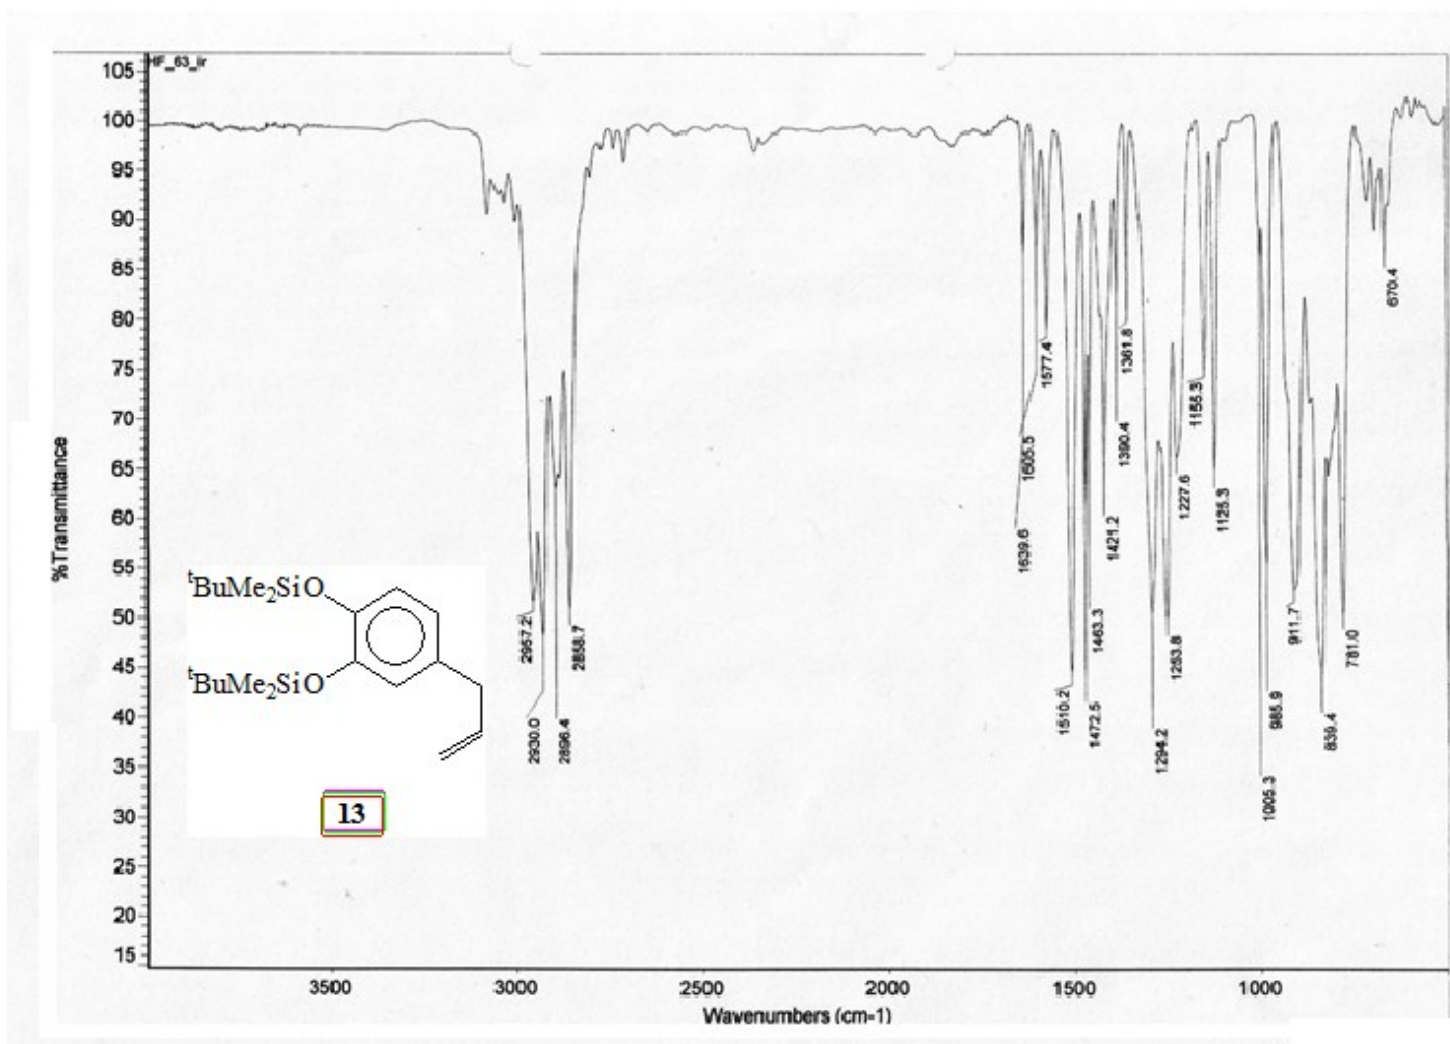

**Fig. S9.** IR spectrum of polymer **13**.

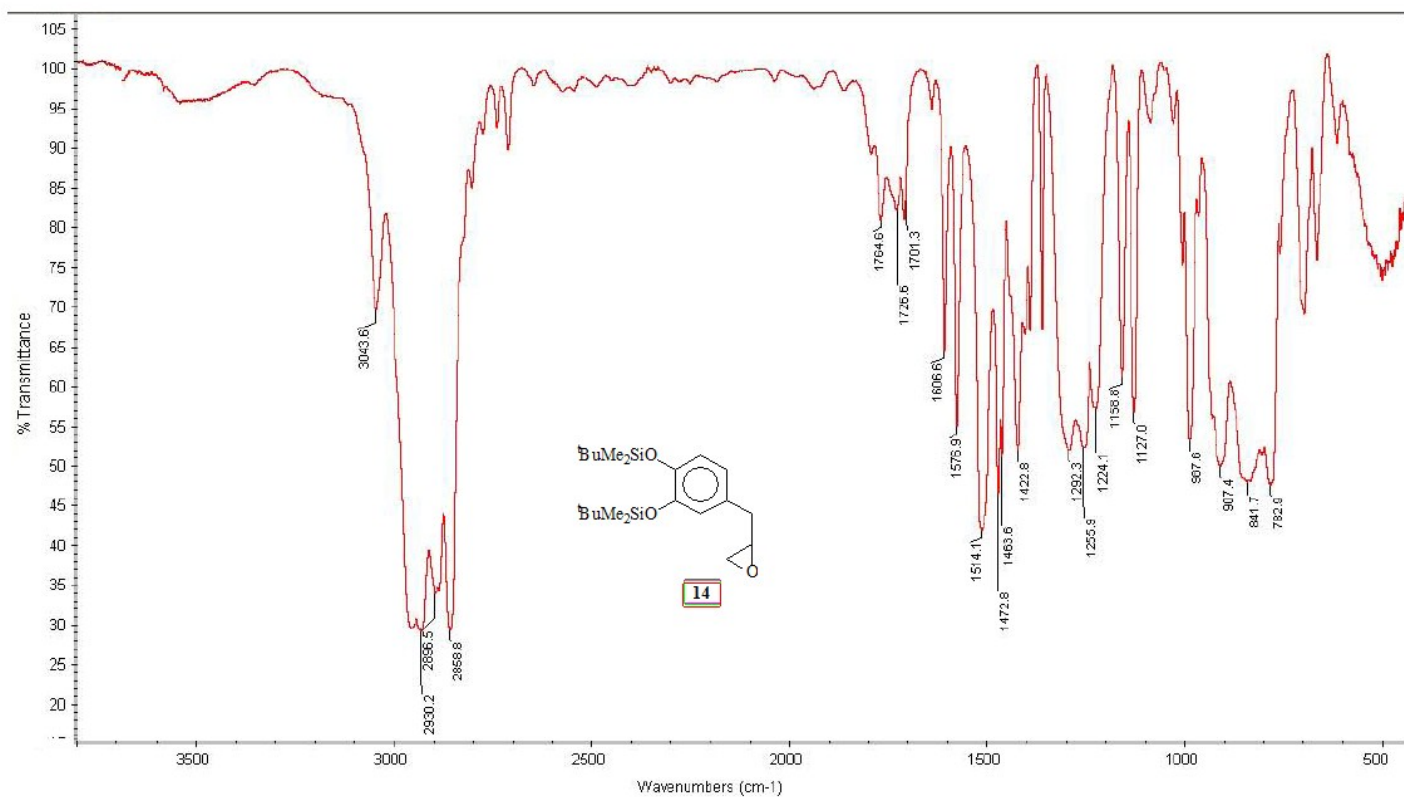

**Fig. S10.** IR spectrum of polymer **14**.

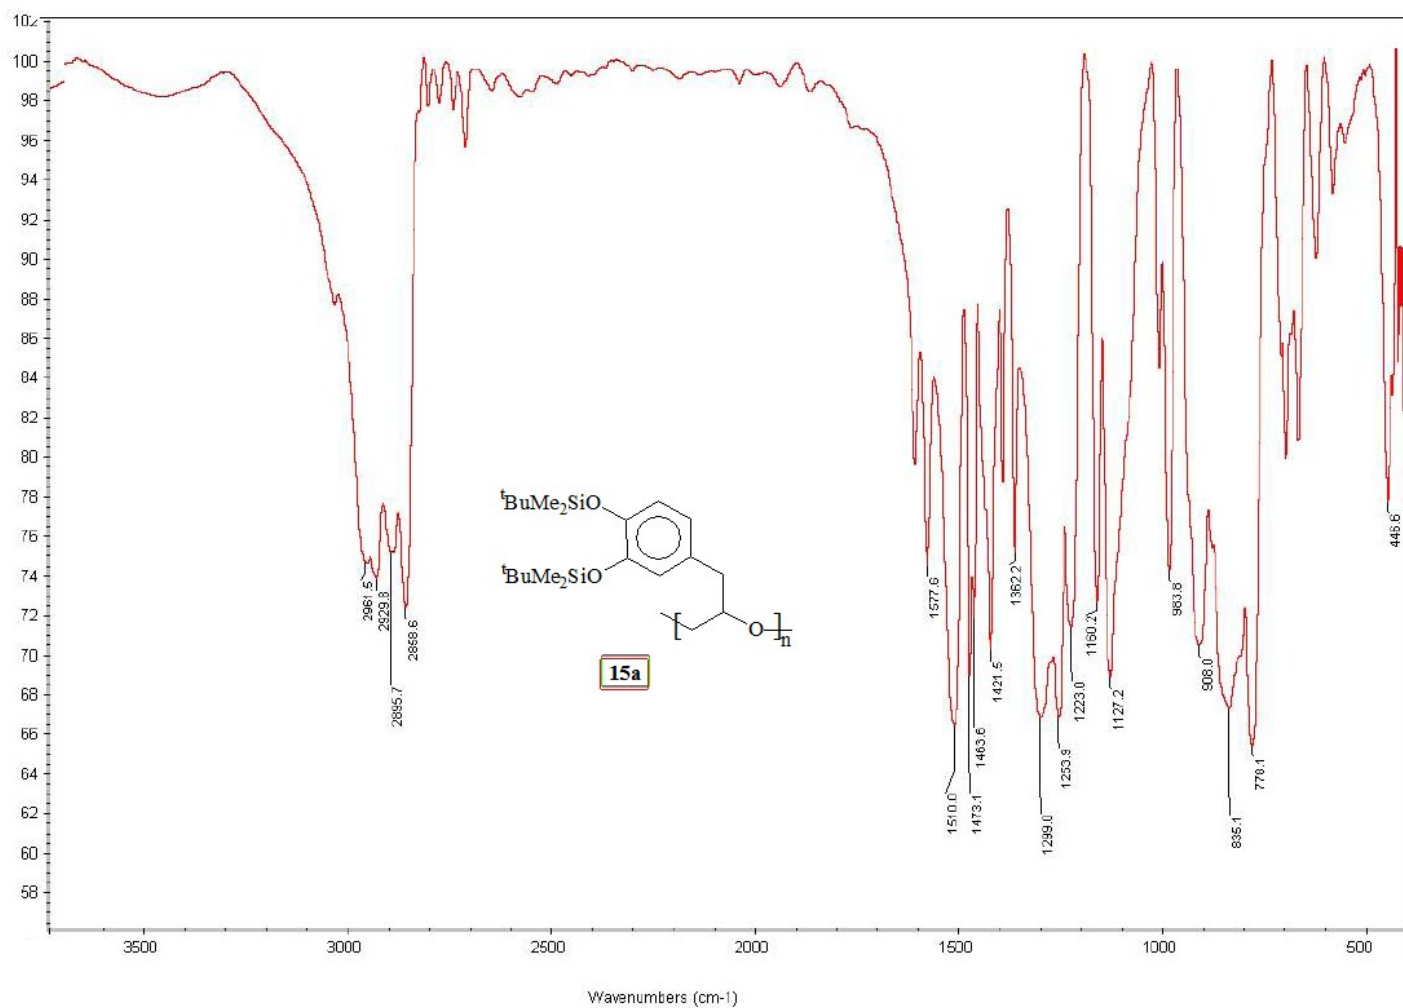

**Fig. S11.** IR spectrum of polymer **15a**.

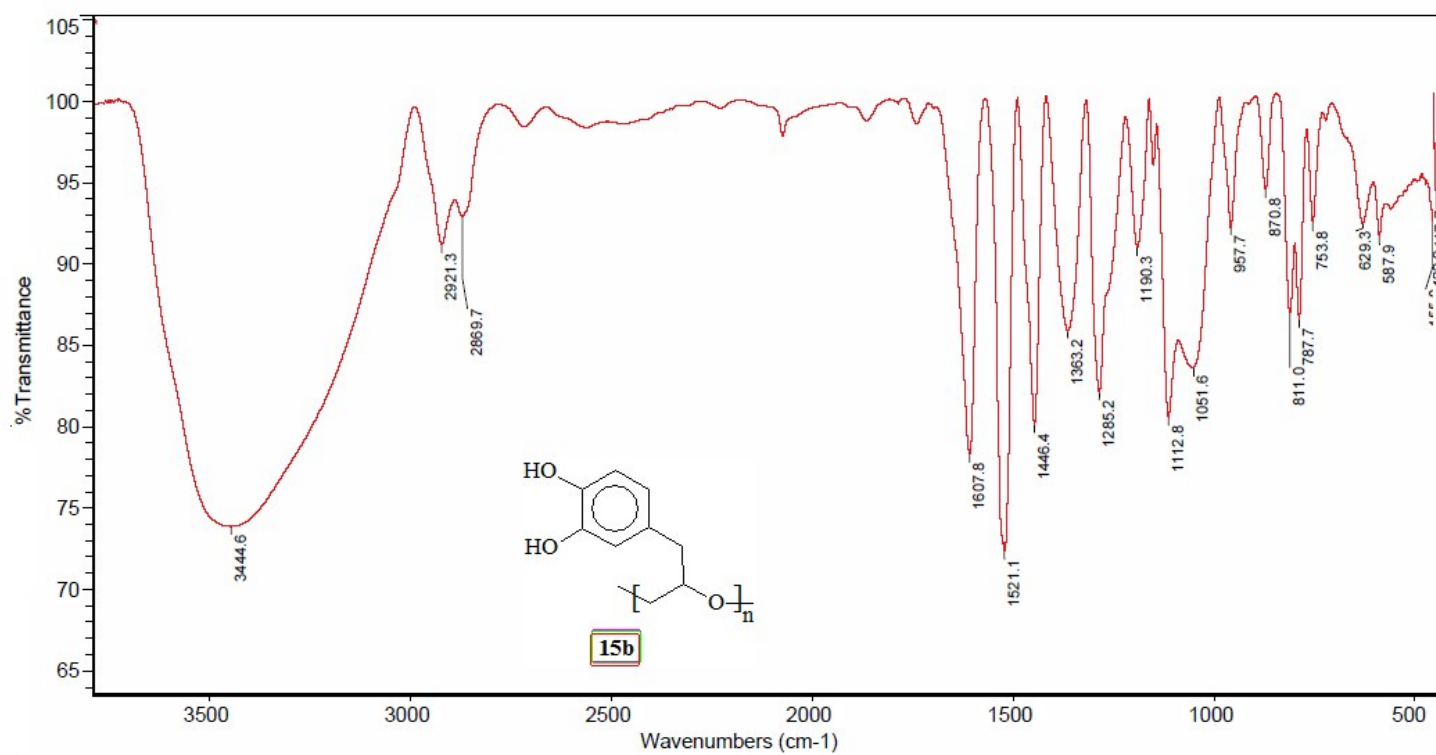

**Fig. S12.** IR spectrum of polymer **15b**.

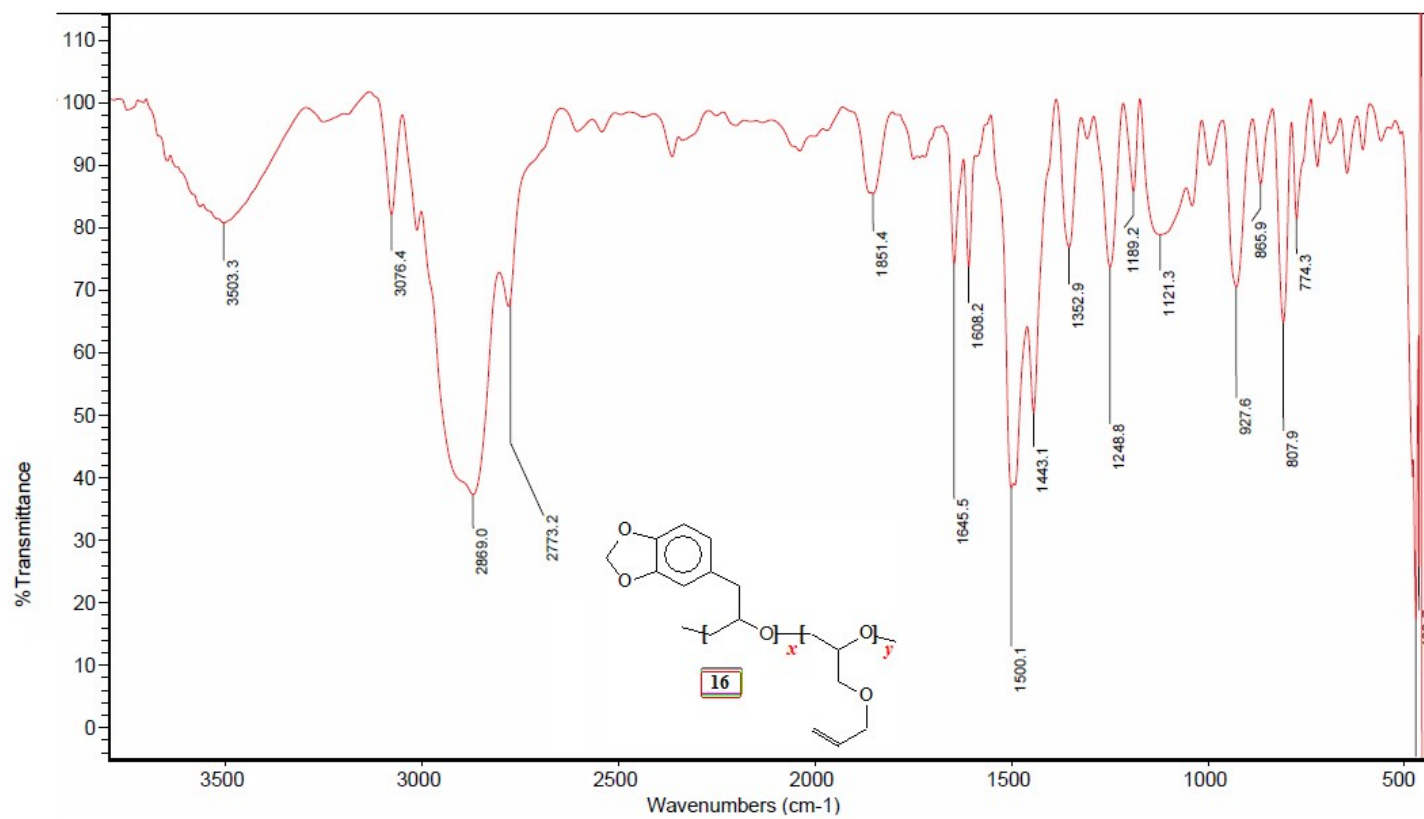

**Fig. S13.** IR spectrum of polymer **16**.



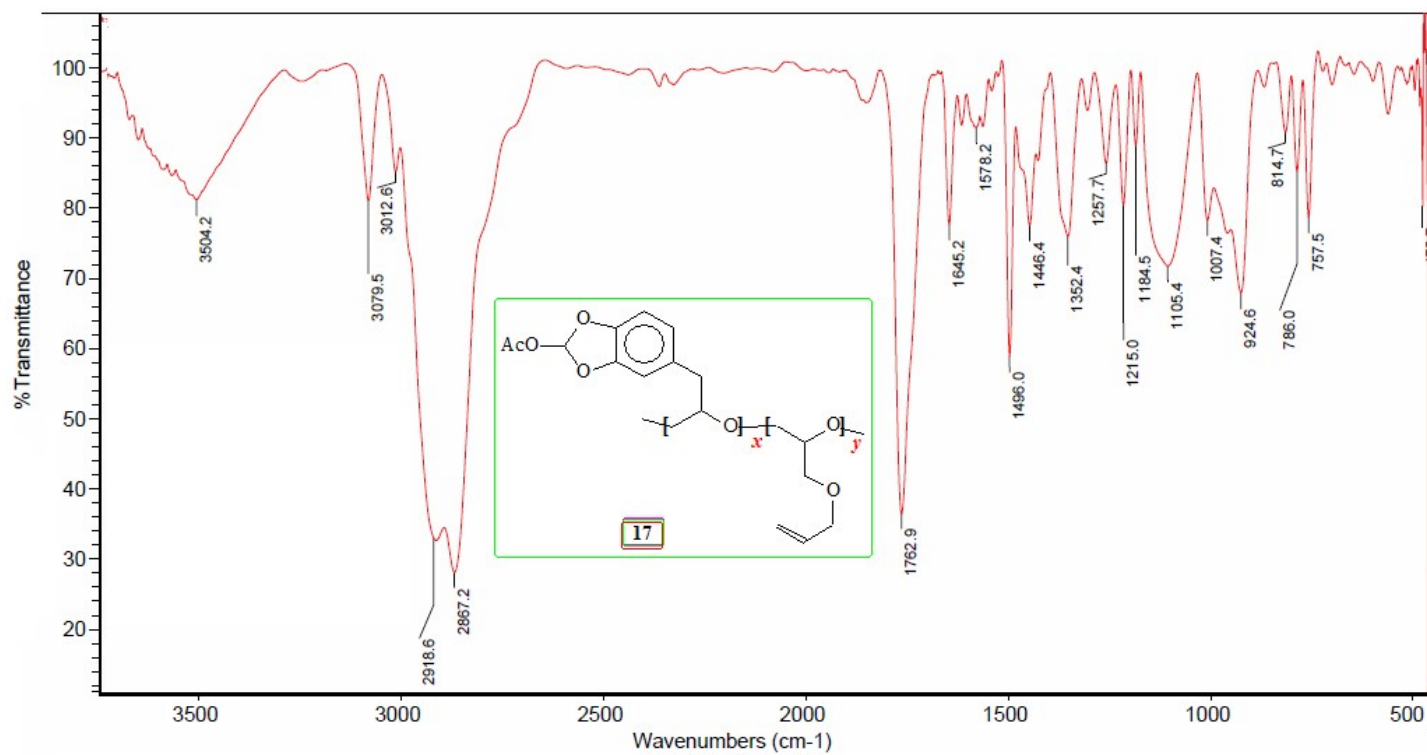

**Fig. S14.** IR spectrum of polymer **17**.



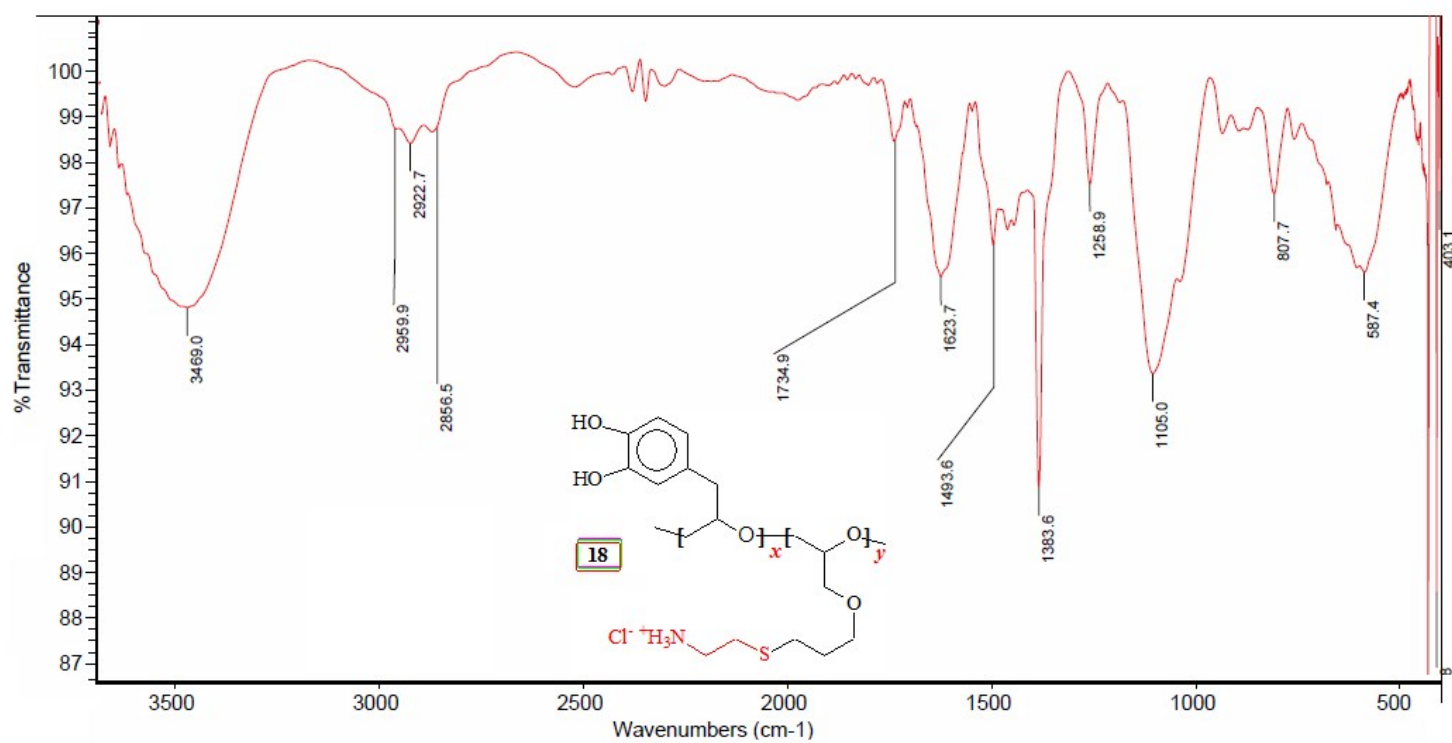

**Fig. S15.** IR spectrum of polymer **18**.

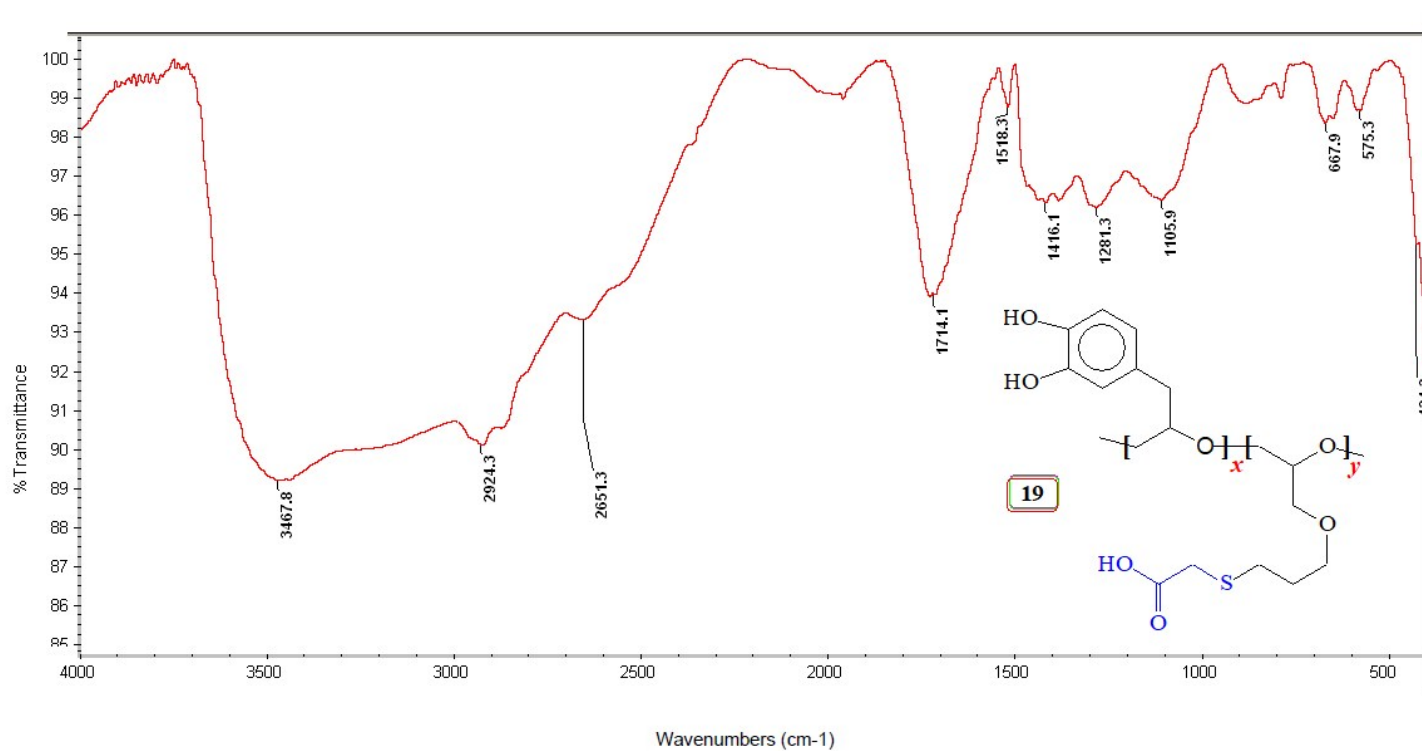

**Fig. S16.** IR spectrum of polymer 19.

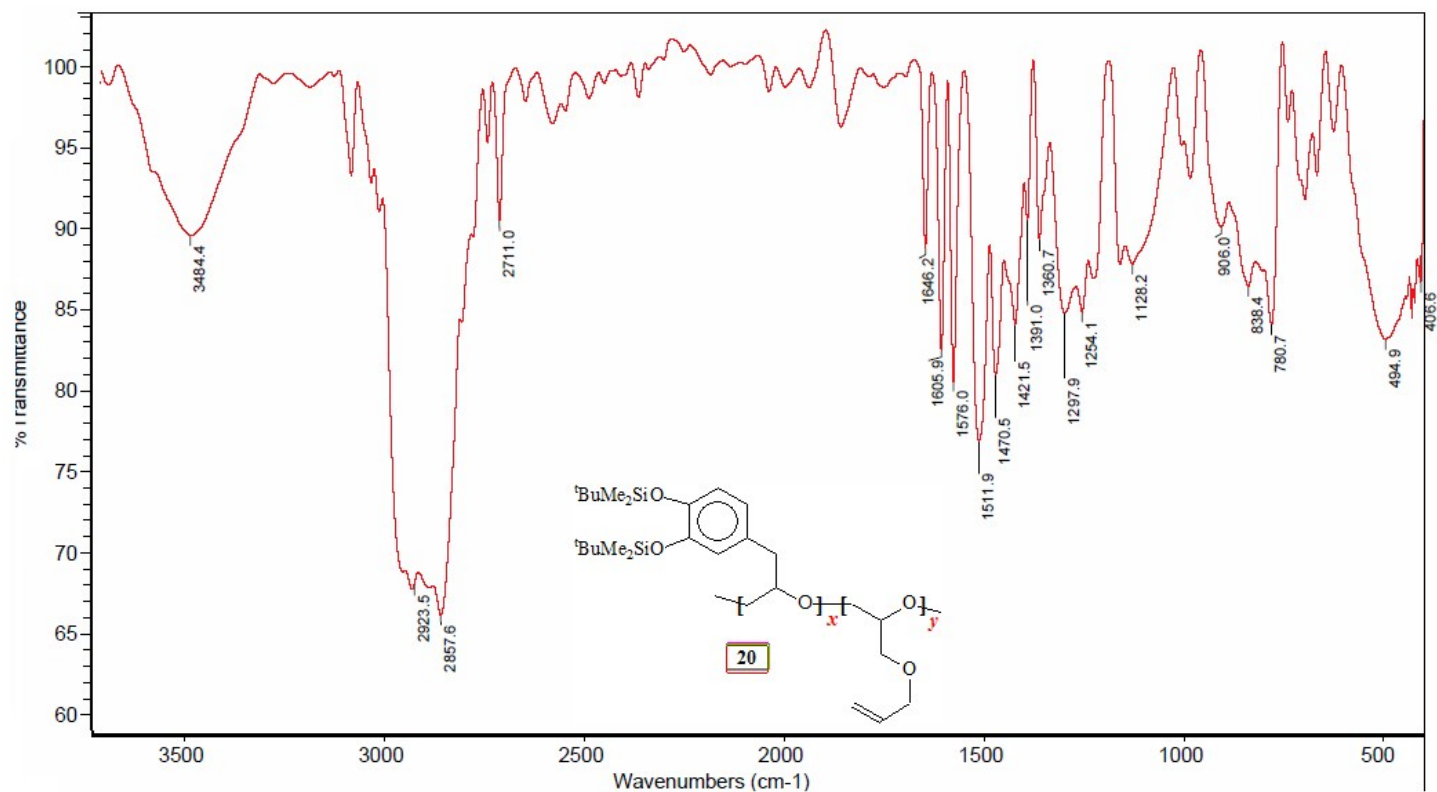

**Fig. S17.** IR spectrum of polymer **20**.

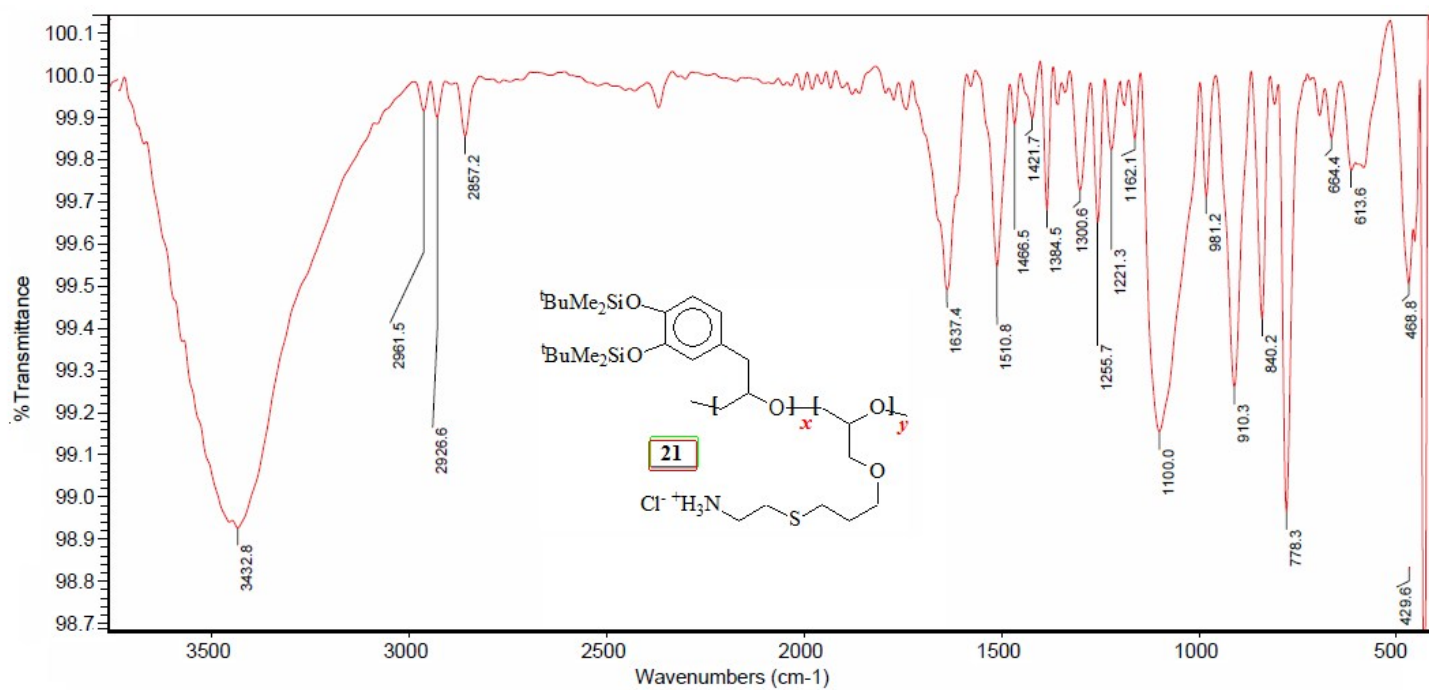

**Fig. S18.** IR spectrum of polymer **21**.

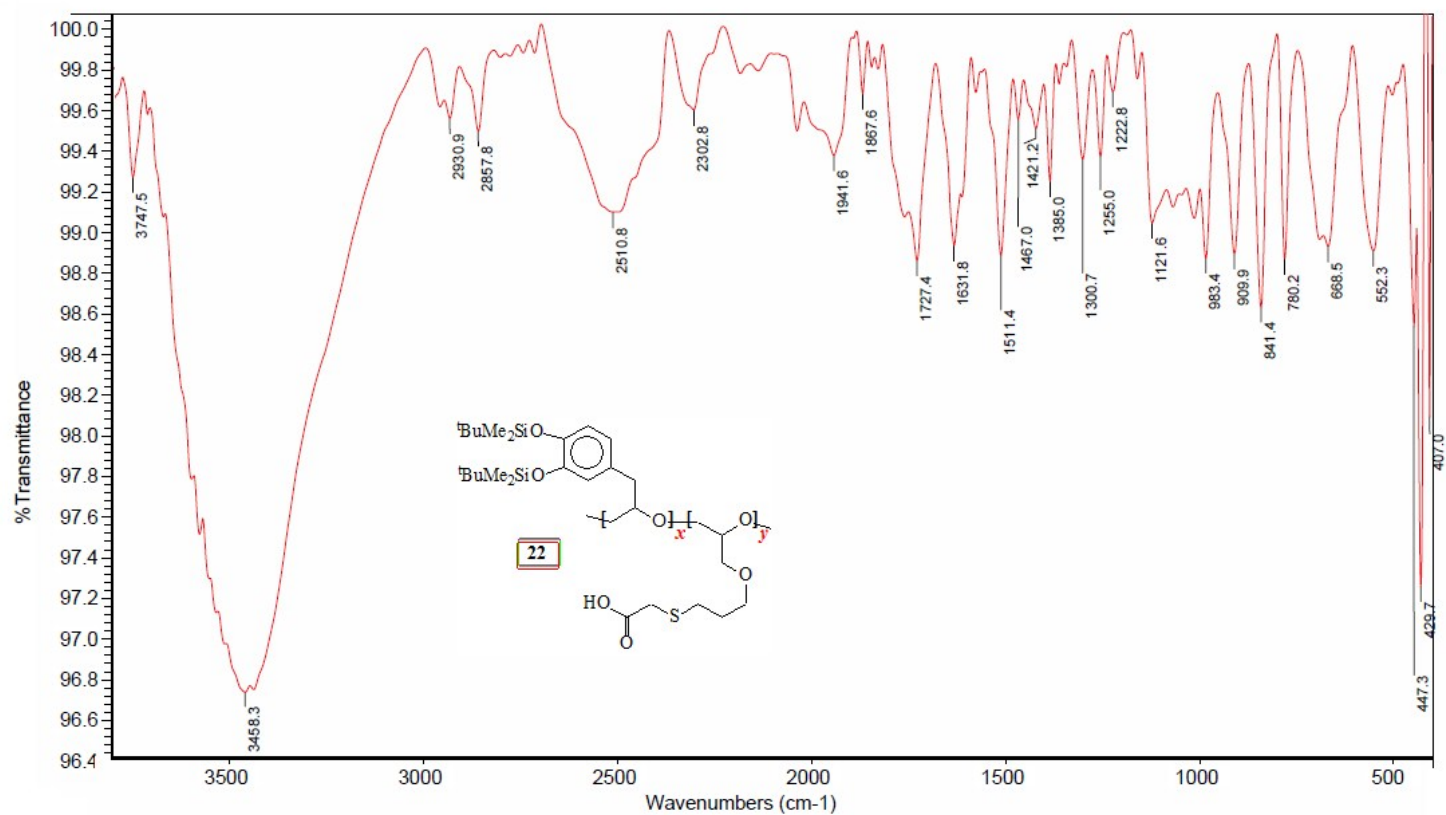

**Fig. S19.** IR spectrum of polymer **22**.

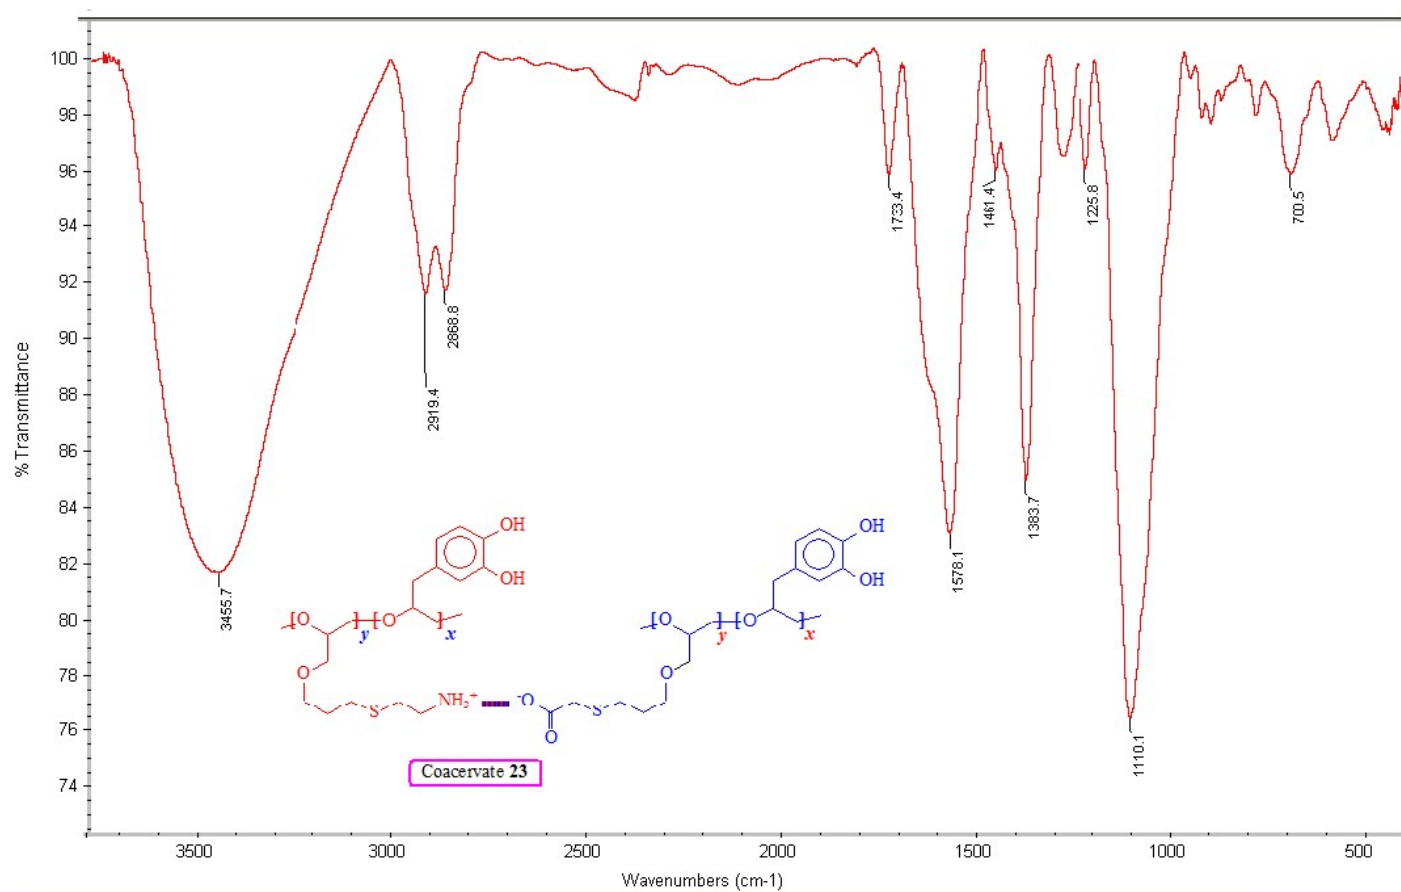

**Fig. S20.** IR spectrum of coacervate **23**.
